# Supplementary material for: Integrated Metagenomic and Metatranscriptomic Analyses of Microbial Communities in the Meso- and Bathypelagic Realm of North Pacific Ocean
Source: Mar Drugs. 2013 Oct 11;11(10):3777–801. doi: 10.3390/md11103777 (PMC3826135; doi:10.3390/md11103777)
Supplement: Supplementary File 1 — Supplementary Materials (PDF, 88 KB) [file marinedrugs-11-03777-s001.pdf]

# Supplementary Materials

**Table S1.** Cyanobacteria identified in metagenomic and metatranscriptomic.

| Samples | Level 1                                          | Function                                                                                                                  | Closest Species                                               |
|---------|--------------------------------------------------|---------------------------------------------------------------------------------------------------------------------------|---------------------------------------------------------------|
| CT04D   | Amino Acids and Derivatives                      | Proline iminopeptidase (EC 3.4.11.5)                                                                                      | <i>Nostoc punctiforme</i><br>(strain ATCC 29133/PCC 73102)    |
|         | Carbohydrates                                    | Gluconolactonase (EC 3.1.1.17)                                                                                            | <i>Synechococcus</i> sp. CC9311                               |
|         |                                                  | Acetate permease ActP (cation/acetate symporter)                                                                          | <i>Anabaena</i> sp. PCC 7120<br>( <i>Nostoc</i> sp. PCC 7120) |
|         |                                                  | Mannose-1-phosphate guanylyltransferase (GDP)<br>(EC 2.7.7.22)                                                            | <i>Synechococcus</i> sp. (strain WH7803)                      |
|         | Clustering-based subsystems                      | Phytoene desaturase (EC 1.14.99.-)                                                                                        | <i>Nostoc punctiforme</i><br>(strain ATCC 29133/PCC 73102)    |
|         |                                                  | Adenylate cyclase                                                                                                         | <i>Anabaena</i> sp. PCC 7120<br>( <i>Nostoc</i> sp. PCC 7120) |
|         | Cofactors, Vitamins, Prosthetic Groups, Pigments | 5-amino-6-(5-phosphoribosylamino)uracil reductase<br>(EC 1.1.1.193)                                                       | <i>Synechococcus elongatus</i> PCC 7942                       |
|         |                                                  | Diaminohydroxyphosphoribosylaminopyrimidine deaminase<br>(EC 3.5.4.26)                                                    | <i>Synechococcus elongatus</i> PCC 7942                       |
|         | Fatty Acids, Lipids, and Isoprenoids             | Phytoene desaturase (EC 1.14.99.-)                                                                                        | <i>Nostoc punctiforme</i><br>(strain ATCC 29133/PCC 73102)    |
|         |                                                  | Adenylate cyclase (EC 4.6.1.1)                                                                                            | <i>Anabaena</i> sp. PCC 7120<br>( <i>Nostoc</i> sp. PCC 7120) |
|         | Miscellaneous                                    | Serine peptidase (Alpha/beta hydrolase superfamily) fused to N- terminal uncharacterized domain specific to cyanobacteria | <i>Synechococcus</i> sp. CC9311                               |
|         |                                                  | Na <sup>+</sup> /H <sup>+</sup> antiporter                                                                                | <i>Nostoc punctiforme</i> PCC 73102                           |
|         | Potassium metabolism                             | Potassium voltage-gated channel subfamily KQT                                                                             | <i>Synechococcus</i> sp. RCC307                               |
|         | Protein Metabolism                               | Acetate permease ActP (cation/acetate symporter)                                                                          | <i>Anabaena</i> sp. PCC 7120<br>( <i>Nostoc</i> sp. PCC 7120) |
|         |                                                  | Selenide,water dikinase (EC 2.7.9.3)                                                                                      | <i>Microcystis aeruginosa</i><br>(strain NIES-843)            |
|         | Regulation and Cell signaling                    | Adenylate cyclase (EC 4.6.1.1)                                                                                            | <i>Anabaena</i> sp. PCC 7120<br>( <i>Nostoc</i> sp. PCC 7120) |
|         |                                                  | ATP synthase alpha chain<br>(EC 3.6.3.14)                                                                                 | <i>Crocospaera watsonii</i> WH 8501                           |
|         | Respiration                                      | Cytochrome c oxidase polypeptide I (EC 1.9.3.1)                                                                           | <i>Prochlorococcus marinus</i> NATL1A                         |
|         |                                                  | soluble [2Fe-2S] ferredoxin                                                                                               | <i>Cyanothece</i> sp.<br>(strain PCC 7425/ATCC 29141)         |
|         | Virulence, Disease and Defense                   | Negative regulator of beta-lactamase expression                                                                           | <i>Synechococcus</i> sp. WH 7805                              |
| CT04R   | Monosaccharides                                  | Ribokinase (EC 2.7.1.15)                                                                                                  | <i>Synechococcus</i> sp. RS9917                               |
|         | Sugar utilization in Thermotogales               | Ribokinase (EC 2.7.1.15)                                                                                                  | <i>Synechococcus</i> sp. RS9917                               |

Table S1. Cont.

|       |                                                  |                                                                                                                |                                                                                                |
|-------|--------------------------------------------------|----------------------------------------------------------------------------------------------------------------|------------------------------------------------------------------------------------------------|
| CT05D | Amino Acids and Derivatives                      | 5,10-methylenetetrahydrofolate reductase (EC 1.5.1.20)                                                         | <i>Synechococcus</i> sp. CC9605                                                                |
|       | Carbohydrates                                    | 5,10-methylenetetrahydrofolate reductase (EC 1.5.1.20)                                                         | <i>Synechococcus</i> sp. CC9605                                                                |
|       | Carbohydrates                                    | decarboxylase                                                                                                  | <i>Prochlorococcus marinus</i> MIT 9313                                                        |
|       | Clustering-based subsystems                      | Adenylosuccinate synthetase (EC 6.3.4.4)                                                                       | <i>Cyanothece</i> sp. PCC 7425                                                                 |
|       | Cofactors, Vitamins, Prosthetic Groups, Pigments | 5,10-methylenetetrahydrofolate reductase (EC 1.5.1.20)                                                         | <i>Synechococcus</i> sp. CC9605                                                                |
|       | Miscellaneous                                    | Scaffold protein for [4Fe-4S] cluster assembly, MRP-like, similar to chloroplast-targeted plant protein HCF101 | <i>Synechocystis</i> sp. (strain ATCC 27184/PCC 6803/N-1)                                      |
|       | Nucleosides and Nucleotides                      | Adenylosuccinate synthetase (EC 6.3.4.4)                                                                       | <i>Cyanothece</i> sp. PCC 7425                                                                 |
|       | Photosynthesis                                   | photosystem II protein D1 (PsbA)                                                                               | <i>Synechococcus</i> sp. RCC307                                                                |
|       | Protein Metabolism                               | Arginyl-tRNA synthetase (EC 6.1.1.19)                                                                          | <i>Synechococcus</i> sp. CC9605                                                                |
|       | Protein Metabolism                               | Chaperone protein HtpG                                                                                         | <i>Synechococcus</i> sp. (strain WH8102)                                                       |
|       | Stress Response                                  | Glutamate decarboxylase (EC 4.1.1.15)                                                                          | <i>Prochlorococcus marinus</i> (strain MIT 9313)                                               |
|       |                                                  | Threonine dehydratase, catabolic (EC 4.3.1.19)                                                                 | <i>Anabaena variabilis</i> (strain ATCC 29413/PCC 7937)<br>Cyanobacteria bacterium Yellowstone |
| CT06D | Amino Acids and Derivatives                      | Urease accessory protein UreG                                                                                  | B-Prime ( <i>Synechococcus</i> sp. JA-2-3B'a(2-13))                                            |
|       |                                                  | Threonine dehydratase, catabolic (EC 4.3.1.19)                                                                 | <i>Anabaena variabilis</i> (strain ATCC 29413/PCC 7937)                                        |
|       |                                                  | Glutamate synthase [NADPH] small chain (EC 1.4.1.13)                                                           | <i>Cyanothece</i> sp. PCC 7424                                                                 |
|       |                                                  | Threonine dehydratase, catabolic (EC 4.3.1.19)                                                                 | <i>Anabaena variabilis</i> (strain ATCC 29413/PCC 7937)                                        |
|       |                                                  | Transketolase (EC 2.2.1.1)                                                                                     | <i>Nostoc punctiforme</i> PCC 73102<br><i>Cyanothece</i> sp. (strain PCC 7424)                 |
|       |                                                  | L-alanine:glyoxylate aminotransferase (EC 2.6.1.44)                                                            | ( <i>Synechococcus</i> sp. (strain ATCC 29155))                                                |
|       | Carbohydrates                                    | Transketolase (EC 2.2.1.1)                                                                                     | <i>Nostoc punctiforme</i> PCC 73102                                                            |
|       |                                                  | Mannose-1-phosphate guanylyltransferase (GDP) (EC 2.7.7.22)                                                    | <i>Synechococcus</i> sp. CC9902                                                                |
|       |                                                  | Serine--pyruvate aminotransferase (EC 2.6.1.51)                                                                | <i>Cyanothece</i> sp. (strain PCC 7424)<br>( <i>Synechococcus</i> sp. (strain ATCC 29155))     |
|       |                                                  | Transketolase (EC 2.2.1.1)                                                                                     | <i>Nostoc punctiforme</i> PCC 73102                                                            |

Table S1. Cont.

|                                                  |                                                             |                                                                                                |
|--------------------------------------------------|-------------------------------------------------------------|------------------------------------------------------------------------------------------------|
| Cell Division and Cell Cycle                     | Carbamoyl-phosphate synthase large chain (EC 6.3.5.5)       | <i>Prochlorococcus marinus</i> MIT 9303                                                        |
| Cell Wall and Capsule                            | Mannose-1-phosphate guanylyltransferase (GDP) (EC 2.7.7.22) | <i>Synechococcus</i> sp. CC9902                                                                |
| Clustering-based subsystems                      | Peptidyl-tRNA hydrolase (EC 3.1.1.29)                       | <i>Synechococcus elongatus</i> PCC 7942                                                        |
| Cofactors, Vitamins, Prosthetic Groups, Pigments | Molybdenum cofactor biosynthesis protein MoaD               | <i>Thermosynechococcus elongatus</i> (strain BP-1)                                             |
|                                                  | Glutamate synthase [NADPH] small chain (EC 1.4.1.13)        | <i>Cyanothece</i> sp. PCC 7424                                                                 |
|                                                  | Flavodoxin                                                  | <i>Synechococcus</i> sp. CC9311                                                                |
|                                                  | Flavodoxin 1                                                | <i>Synechococcus</i> sp. CC9311                                                                |
|                                                  | Sulfur carrier protein adenylyltransferase ThiF             | <i>Cyanobacteria bacterium</i> Yellowstone B-Prime ( <i>Synechococcus</i> sp. JA-2-3B'a(2-13)) |
| Dormancy and Sporulation                         | Peptidyl-tRNA hydrolase (EC 3.1.1.29)                       | <i>Synechococcus elongatus</i> PCC 7942                                                        |
| Membrane Transport                               | Dipeptide transport ATP-binding protein DppD (TC 3.A.1.5.2) | <i>Cyanothece</i> sp. ATCC 51142                                                               |
| Nitrogen Metabolism                              | Glutamate synthase [NADPH] small chain (EC 1.4.1.13)        | <i>Cyanothece</i> sp. PCC 7424                                                                 |
| Nucleosides and Nucleotides                      | Carbamoyl-phosphate synthase large chain (EC 6.3.5.5)       | <i>Prochlorococcus marinus</i> MIT 9303                                                        |
| Photosynthesis                                   | Octaprenyl-diphosphate synthase (EC 2.5.1.-)                | -                                                                                              |
| Protein Metabolism                               | SSU ribosomal protein S6p                                   | <i>Prochlorococcus marinus</i> SS120 (subsp. <i>marinus</i> CCMP1375)                          |
|                                                  | Peptidyl-tRNA hydrolase (EC 3.1.1.29)                       | <i>Synechococcus elongatus</i> PCC 7942                                                        |
|                                                  | Prolyl-tRNA synthetase (EC 6.1.1.15)                        | <i>Synechococcus</i> sp. CC9902                                                                |
|                                                  | Chaperone protein DnaJ                                      | <i>Synechococcus</i> sp. WH 7803                                                               |
|                                                  | Urease accessory protein UreG                               | <i>Thermosynechococcus elongatus</i> BP-1                                                      |
| Stress Response                                  | Chaperone protein DnaJ                                      | <i>Cyanobacteria bacterium</i> Yellowstone B-Prime ( <i>Synechococcus</i> sp. JA-2-3B'a(2-13)) |
|                                                  | 5-oxoprolinase (EC 3.5.2.9)                                 | <i>Synechococcus</i> sp. WH 7803                                                               |
| CT06R                                            | Photosynthesis                                              | <i>Cyanothece</i> sp. (strain ATCC 51142)                                                      |
|                                                  | photosystem II protein D1 (PsbA)                            | <i>Nostoc</i> sp. (strain PCC 7120 / UTEX 2576)                                                |

Table S1. Cont.

|                                                        |                                                                       |                                                                                                               |
|--------------------------------------------------------|-----------------------------------------------------------------------|---------------------------------------------------------------------------------------------------------------|
| Amino Acids and Derivatives                            | Glutamate <i>N</i> -acetyltransferase<br>(EC 2.3.1.35)                | <i>Synechococcus</i> sp.<br>JA-2-3B'a(2-13)                                                                   |
|                                                        | <i>N</i> -acetylglutamate synthase<br>(EC 2.3.1.1)                    | <i>Synechococcus</i> sp.<br>JA-2-3B'a(2-13)                                                                   |
| Carbohydrates                                          | Succinate dehydrogenase flavoprotein subunit<br>(EC 1.3.99.1)         | <i>Anabaena</i> sp. PCC 7120<br>( <i>Nostoc</i> sp. PCC 7120)                                                 |
| Cell Wall and Capsule                                  | Bacillosamine/Legionaminic acid biosynthesis<br>aminotransferase PglE | <i>Prochlorococcus marinus</i><br>(strain MIT 9303)<br><i>Cyanothece</i> sp. (strain PCC 7424)                |
|                                                        | ADP-heptose synthase (EC 2.7.-.-)                                     | ( <i>Synechococcus</i> sp.<br>(strain ATCC 29155))                                                            |
|                                                        | D-glycero-beta-D-manno-heptose 7-phosphate kinase                     | <i>Cyanothece</i> sp. (strain PCC 7424)<br>( <i>Synechococcus</i> sp.<br>(strain ATCC 29155))                 |
|                                                        | Ribosomal-protein-S18p-alanine acetyltransferase<br>(EC 2.3.1.-)      | <i>Microcystis aeruginosa</i> NIES-843                                                                        |
| CT12D                                                  | Glycosyltransferase                                                   | <i>Anabaena variabilis</i> ATCC 29413                                                                         |
|                                                        | Glycosyltransferase (EC 2.4.1.-)                                      | <i>Anabaena variabilis</i> ATCC 29413                                                                         |
|                                                        | Translation elongation factor Ts                                      | <i>Prochlorococcus marinus</i> (strain<br>MIT 9303)                                                           |
|                                                        | Alanyl-tRNA synthetase (EC 6.1.1.7)                                   | <i>Anabaena variabilis</i> ATCC 29413                                                                         |
| Clustering-based subsystems                            | Amino acid permease in hypothetical Actinobacterial gene<br>cluster   | <i>Cyanothece</i> sp. (strain PCC<br>7425/ATCC 29141)                                                         |
|                                                        | Helicase PriA essential for oriC/DnaA-independent DNA<br>replication  | <i>Cyanothece</i> sp. PCC 7425                                                                                |
|                                                        | Ribosomal-protein-S18p-alanine acetyltransferase<br>(EC 2.3.1.-)      | <i>Microcystis aeruginosa</i> NIES-843                                                                        |
|                                                        | Competence/damage-inducible protein CinA                              | <i>Synechococcus</i> sp.<br>(strain JA-3-3Ab) ( <i>Cyanobacteria</i><br><i>bacterium</i> Yellowstone A-Prime) |
| Cofactors, Vitamins,<br>Prosthetic Groups,<br>Pigments | Phosphomethylpyrimidine kinase (EC 2.7.4.7)                           | <i>Prochlorococcus marinus</i> (strain<br>MIT 9215)                                                           |
|                                                        | Orotate phosphoribosyltransferase (EC 2.4.2.10)                       | <i>Synechococcus</i> sp. (strain RCC307)                                                                      |
|                                                        | Phosphomethylpyrimidine kinase (EC 2.7.4.7)                           | <i>Prochlorococcus marinus</i><br>(strain MIT 9215)                                                           |
|                                                        | Sulfur carrier protein adenylyltransferase ThiF                       | <i>Cyanothece</i> sp. PCC 8801                                                                                |
| DNA Metabolism                                         | Helicase PriA essential for oriC/DnaA-independent DNA<br>replication  | <i>Cyanothece</i> sp. PCC 7425                                                                                |

Table S1. Cont.

|                                                    |                                                                                |                                                                                                  |
|----------------------------------------------------|--------------------------------------------------------------------------------|--------------------------------------------------------------------------------------------------|
| Miscellaneous                                      | Membrane protein PxcA, involved in light-induced proton extrusion              | <i>Synechocystis</i> sp. (strain ATCC 27184/PCC 6803/N-1)27184/PCC 6803/N-1)                     |
|                                                    | Glutathione <i>S</i> -transferase family protein                               | <i>Prochlorococcus marinus</i> (strain MIT 9313)                                                 |
|                                                    | Ribosomal-protein-S18p-alanine acetyltransferase (EC 2.3.1.-)                  | <i>Microcystis aeruginosa</i> NIES-843                                                           |
|                                                    | Glycosyltransferase                                                            | <i>Anabaena variabilis</i> ATCC 29413                                                            |
|                                                    | Phosphomethylpyrimidine kinase (EC 2.7.4.7)                                    | <i>Prochlorococcus marinus</i> (strain MIT 9215)                                                 |
|                                                    | Competence/damage-inducible protein CinA                                       | <i>Synechococcus</i> sp. (strain JA-3-3Ab) ( <i>Cyanobacteria bacterium</i> Yellowstone A-Prime) |
| Nucleosides and Nucleotides                        | Orotate phosphoribosyltransferase (EC 2.4.2.10)                                | <i>Synechococcus</i> sp. (strain RCC307)                                                         |
| Phages, Prophages, Transposable elements, Plasmids | Heat shock protein 60 family chaperone GroEL                                   | <i>Prochlorococcus marinus</i> MED4 (subsp. pastoris str. CCMP1378)                              |
| Photosynthesis                                     | photosystem II protein D1 (PsbA)                                               | <i>Cyanothece</i> sp. (strain PCC 8802) ( <i>Synechococcus</i> sp. (strain RF-2))                |
| Protein Metabolism                                 | Translation elongation factor Ts                                               | <i>Prochlorococcus marinus</i> (strain MIT 9303)                                                 |
|                                                    | Translation elongation factor Tu                                               | <i>Cyanobacteria bacterium</i> Yellowstone A-Prime ( <i>Synechococcus</i> sp. JA-3-3Ab)          |
|                                                    | Alanyl-tRNA synthetase (EC 6.1.1.7)                                            | <i>Anabaena variabilis</i> ATCC 29413                                                            |
|                                                    | Valyl-tRNA synthetase (EC 6.1.1.9)                                             | <i>Trichodesmium erythraeum</i> (strain IMS101)                                                  |
|                                                    | Prolyl endopeptidase (EC 3.4.21.26)                                            | <i>Gloeobacter violaceus</i> PCC7421                                                             |
|                                                    | Heat shock protein 60 family chaperone GroEL                                   | <i>Prochlorococcus marinus</i> MED4 (subsp. pastoris str. CCMP1378)                              |
|                                                    | 4-keto-6-deoxy- <i>N</i> -Acetyl-D-hexosaminy-(Lipid carrier) aminotransferase | <i>Prochlorococcus marinus</i> (strain MIT 9303)                                                 |
| Respiration                                        | Succinate dehydrogenase flavoprotein subunit (EC 1.3.99.1)                     | <i>Anabaena</i> sp. PCC 7120 ( <i>Nostoc</i> sp. PCC 7120)                                       |
| Stress Response                                    | Glutathione <i>S</i> -transferase family protein                               | <i>Prochlorococcus marinus</i> (strain MIT 9313)                                                 |
| Carbohydrates                                      | Ribokinase (EC 2.7.1.15)                                                       | <i>Synechococcus</i> sp. RS9917                                                                  |
| Fatty Acids, Lipids, and Isoprenoids               | Phytoene desaturase, pro-zeta-carotene producing (EC 1.-.-.-)                  | <i>Synechococcus elongatus</i> (strain PCC 7942) ( <i>Anacystis nidulans</i> R2)                 |
| Phosphorus Metabolism                              | Alkaline phosphatase (EC 3.1.3.1)                                              | <i>Cyanothece</i> sp. CCY0110                                                                    |
